# Supplementary material for: Managerial Incentives to Increase Risk Provided by Debt, Stock, and Options
Source: Atypon-hosted journal article supplement (doi:10.1287/mnsc.2017.2811), 2017-09-06
Supplement: mnsc.2017.2811-sm.pdf [file mnsc.2017.2811-sm.pdf]

## Internet Appendix: Anderson and Core Table 4, Panels A and B showing coefficients on control variables

### Comparison of the association between vega and the sensitivity measures and future risk choices

This table presents OLS regression results using unscaled (columns 1 to 6) and scaled (columns 7 to 12) incentive variables. Incentive variables and controls are measured in year  $t$ . The dependent variables are measured in year  $t+1$ . The incentive variables are described in Appendix A, and control and dependent variables are described in Appendix B. Variables are standardized to have a mean of zero and standard deviation of one. All regressions include year and 2-digit SIC industry fixed effects. The t-statistics reported in parentheses are based on robust standard errors clustered by both firm and year. To compute the standard error of the difference between the coefficients on the sensitivity and vega, we use a stacked regression model. \*\*\*, \*\*, and \* indicate significance at the 1, 5, and 10% levels, respectively.

|                             | <i>ln</i> (Stock<br>Volatility) | <i>ln</i> (Asset<br>Volatility) | <i>R</i> & <i>D</i><br>Expense | - <i>CAPEX</i>       | <i>Herfindahl</i><br>Index | <i>Book</i><br>Leverage | <i>ln</i> (Stock<br>Volatility) | <i>ln</i> (Asset<br>Volatility) | <i>R</i> & <i>D</i><br>Expense | - <i>CAPEX</i>       | <i>Herfindahl</i><br>Index | <i>Book</i><br>Leverage |
|-----------------------------|---------------------------------|---------------------------------|--------------------------------|----------------------|----------------------------|-------------------------|---------------------------------|---------------------------------|--------------------------------|----------------------|----------------------------|-------------------------|
|                             | (1)                             | (2)                             | (3)                            | (4)                  | (5)                        | (6)                     | (7)                             | (8)                             | (9)                            | (10)                 | (11)                       | (12)                    |
| <b>Panel A: Vega</b>        |                                 |                                 |                                |                      |                            |                         |                                 |                                 |                                |                      |                            |                         |
| CEO Tenure                  | -0.019<br>(-1.55)               | -0.057***<br>(-4.32)            | -0.036**<br>(-2.09)            | -0.007<br>(-0.49)    | -0.007<br>(-0.32)          | 0.027<br>(1.53)         | -0.018<br>(-1.42)               | -0.037**<br>(-2.21)             | 0.021<br>(1.32)                | 0.007<br>(0.47)      | 0.008<br>(0.33)            | 0.008<br>(0.48)         |
| Cash<br>Compensation        | -0.003<br>(-0.21)               | 0.000<br>(0.02)                 | 0.004<br>(0.27)                | 0.026<br>(1.28)      | -0.024<br>(-1.07)          | 0.002<br>(0.13)         | -0.025**<br>(-2.23)             | -0.016<br>(-0.82)               | 0.013<br>(0.94)                | 0.029<br>(1.40)      | -0.028<br>(-1.29)          | -0.010<br>(-0.67)       |
| <i>ln</i> (Sales)           | -0.346***<br>(-13.11)           | -0.444***<br>(-14.69)           | -0.331***<br>(-10.18)          | -0.002<br>(-0.11)    | -0.234***<br>(-7.57)       | 0.139***<br>(2.82)      | -0.273***<br>(-9.86)            | -0.304***<br>(-10.04)           | -0.243***<br>(-9.49)           | 0.015<br>(0.72)      | -0.208***<br>(-6.91)       | 0.104***<br>(2.14)      |
| Market-to-Book              | -0.130***<br>(-4.82)            | -0.010<br>(-0.24)               | -0.010<br>(-0.28)              | -0.092***<br>(-4.92) | 0.117***<br>(5.62)         | 0.024<br>(0.73)         | -0.032<br>(-1.31)               | 0.144***<br>(3.33)              | 0.063<br>(1.59)                | -0.079***<br>(-3.78) | 0.147***<br>(6.90)         | 0.007<br>(0.21)         |
| Book Leverage               | 0.105***<br>(4.56)              | -0.165***<br>(-6.84)            | 0.014<br>(0.62)                | 0.065***<br>(3.30)   | 0.024<br>(1.10)            |                         | 0.100***<br>(4.56)              | -0.171***<br>(-7.68)            | 0.018<br>(0.80)                | 0.067***<br>(3.40)   | 0.025<br>(1.15)            |                         |
| <i>R</i> & <i>D</i> Expense | 0.080***<br>(3.91)              | 0.086***<br>(4.50)              |                                |                      | 0.106***<br>(4.07)         | -0.124***<br>(-4.53)    | 0.065**<br>(2.44)               | 0.064***<br>(3.26)              |                                |                      | 0.096***<br>(3.59)         | -0.124***<br>(-4.64)    |
| <i>CAPEX</i>                | 0.023<br>(1.53)                 | -0.003<br>(-0.14)               |                                |                      | 0.056***<br>(2.58)         |                         | 0.017<br>(1.28)                 | -0.012<br>(-0.52)               |                                |                      | 0.055**<br>(2.55)          |                         |
| Surplus Cash                |                                 |                                 | 0.325***<br>(8.83)             | -0.027*<br>(-1.78)   |                            |                         |                                 |                                 | 0.323***<br>(9.09)             | -0.028*<br>(-1.88)   |                            |                         |
| <i>ln</i> (Sales<br>Growth) |                                 |                                 | -0.036*<br>(-1.74)             | -0.064***<br>(-5.00) | 0.005<br>(0.44)            |                         |                                 |                                 | -0.028<br>(-1.40)              | -0.062***<br>(-4.84) | 0.006<br>(0.57)            |                         |
| Return                      |                                 |                                 | -0.065<br>(-1.47)              | -0.019***<br>(-2.79) | -0.018<br>(-0.46)          |                         |                                 |                                 | -0.026<br>(-0.76)              | -0.012<br>(-1.50)    | 0.001<br>(0.02)            |                         |
| ROA                         |                                 |                                 |                                |                      | 0.015<br>(0.83)            | 0.076**<br>(2.29)       |                                 |                                 |                                |                      | 0.023<br>(1.23)            | 0.076**<br>(2.24)       |
| Dividend Cut                |                                 |                                 |                                |                      | -0.014<br>(-1.53)          |                         |                                 |                                 |                                |                      | -0.015<br>(-1.53)          |                         |
| Turnover                    |                                 |                                 |                                |                      | -0.002<br>(-0.14)          |                         |                                 |                                 |                                |                      | -0.003<br>(-0.28)          |                         |
| PPE                         |                                 |                                 |                                |                      |                            | 0.093***<br>(3.00)      |                                 |                                 |                                |                      |                            | 0.095***<br>(3.08)      |
| Mod. Z-Score                |                                 |                                 |                                |                      |                            | -0.348***<br>(-10.47)   |                                 |                                 |                                |                      |                            | -0.340***<br>(-10.32)   |

|                             | <i>ln</i> (Stock<br>Volatility) | <i>ln</i> (Asset<br>Volatility) | <i>R&amp;D</i><br>Expense | -CAPEX               | <i>Herfindahl</i><br>Index | <i>Book</i><br>Leverage | <i>ln</i> (Stock<br>Volatility) | <i>ln</i> (Asset<br>Volatility) | <i>R&amp;D</i><br>Expense | -CAPEX               | <i>Herfindahl</i><br>Index | <i>Book</i><br>Leverage |
|-----------------------------|---------------------------------|---------------------------------|---------------------------|----------------------|----------------------------|-------------------------|---------------------------------|---------------------------------|---------------------------|----------------------|----------------------------|-------------------------|
|                             | (1)                             | (2)                             | (3)                       | (4)                  | (5)                        | (6)                     | (7)                             | (8)                             | (9)                       | (10)                 | (11)                       | (12)                    |
| Rating                      |                                 |                                 |                           |                      |                            | 0.261***<br>(6.67)      |                                 |                                 |                           |                      |                            | 0.264***<br>(6.73)      |
| Total Wealth                |                                 |                                 |                           |                      |                            |                         | 0.017<br>(1.02)                 | 0.092***<br>(5.22)              | 0.091***<br>(5.66)        | 0.003<br>(0.20)      | 0.001<br>(0.06)            | -0.081***<br>(-3.65)    |
| Delta /<br>Total Wealth     |                                 |                                 |                           |                      |                            |                         | -0.282***<br>(-7.96)            | -0.394***<br>(-6.29)            | -0.166***<br>(-6.32)      | -0.030<br>(-1.64)    | -0.094***<br>(-3.01)       | -0.002<br>(-0.08)       |
| Vega                        | -0.088***<br>(-3.80)            | 0.001<br>(0.05)                 | 0.136***<br>(4.68)        | 0.039***<br>(2.94)   | 0.009<br>(0.38)            | -0.082***<br>(-4.47)    |                                 |                                 |                           |                      |                            |                         |
| Vega / Total<br>Wealth      |                                 |                                 |                           |                      |                            |                         | 0.047***<br>(2.78)              | 0.148***<br>(4.14)              | 0.257***<br>(6.97)        | 0.063***<br>(3.64)   | 0.077***<br>(2.77)         | -0.050**<br>(-2.05)     |
| Observations                | 8,600                           | 7,797                           | 8,192                     | 8,189                | 7,849                      | 8,104                   | 8,600                           | 7,797                           | 8,192                     | 8,189                | 7,849                      | 8,104                   |
| R-squared                   | 0.550                           | 0.380                           | 0.479                     | 0.456                | 0.217                      | 0.382                   | 0.583                           | 0.439                           | 0.497                     | 0.457                | 0.221                      | 0.379                   |
| <b>Panel B: Sensitivity</b> |                                 |                                 |                           |                      |                            |                         |                                 |                                 |                           |                      |                            |                         |
| CEO Tenure                  | -0.024*<br>(-1.92)              | -0.064***<br>(-4.86)            | -0.033*<br>(-1.93)        | -0.006<br>(-0.47)    | -0.008<br>(-0.35)          | -0.003<br>(-0.23)       | 0.003<br>(0.23)                 | -0.021<br>(-1.51)               | -0.000<br>(-0.01)         | 0.005<br>(0.38)      | 0.002<br>(0.10)            | 0.011<br>(0.66)         |
| Cash<br>Compensation        | -0.018<br>(-1.55)               | -0.025<br>(-1.44)               | 0.005<br>(0.28)           | 0.023<br>(1.14)      | -0.029<br>(-1.32)          | -0.047***<br>(-3.23)    | -0.025**<br>(-2.40)             | -0.011<br>(-0.65)               | 0.027<br>(1.63)           | 0.032<br>(1.53)      | -0.024<br>(-1.12)          | 0.008<br>(0.62)         |
| ln(Sales)                   | -0.386***<br>(-14.09)           | -0.480***<br>(-18.97)           | -0.305***<br>(-9.78)      | 0.001<br>(0.07)      | -0.240***<br>(-7.99)       | 0.060<br>(1.33)         | -0.265***<br>(-9.99)            | -0.300***<br>(-11.40)           | -0.266***<br>(-9.54)      | 0.011<br>(0.56)      | -0.212***<br>(-7.05)       | 0.071<br>(1.61)         |
| Market-to-Book              | -0.139***<br>(-4.81)            | -0.011<br>(-0.26)               | 0.001<br>(0.02)           | -0.089***<br>(-4.72) | 0.117***<br>(5.64)         | 0.030<br>(0.94)         | 0.005<br>(0.24)                 | 0.169***<br>(4.68)              | 0.034<br>(0.86)           | -0.081***<br>(-4.12) | 0.140***<br>(6.95)         | 0.038<br>(1.24)         |
| Book Leverage               | 0.111***<br>(4.20)              | -0.182***<br>(-6.98)            | -0.009<br>(-0.36)         | 0.057***<br>(2.75)   | 0.018<br>(0.85)            |                         | 0.027<br>(1.14)                 | -0.275***<br>(-15.29)           | -0.051**<br>(-2.29)       | 0.042**<br>(2.05)    | 0.001<br>(0.06)            |                         |
| R&D Expense                 | 0.065***<br>(3.08)              | 0.071***<br>(3.73)              |                           |                      | 0.104***<br>(4.00)         | -0.122***<br>(-5.00)    | 0.046*<br>(1.84)                | 0.054***<br>(2.98)              |                           |                      | 0.104***<br>(4.08)         | -0.110***<br>(-4.73)    |
| CAPEX                       | 0.025*<br>(1.68)                | 0.000<br>(0.02)                 |                           |                      | 0.056**<br>(2.58)          |                         | 0.023*<br>(1.92)                | -0.003<br>(-0.12)               |                           |                      | 0.056**<br>(2.55)          |                         |
| Surplus Cash                |                                 |                                 | 0.334***<br>(9.31)        | -0.025<br>(-1.62)    |                            |                         |                                 |                                 | 0.338***<br>(9.41)        | -0.024<br>(-1.60)    |                            |                         |
| ln(Sales<br>Growth)         |                                 |                                 | -0.039*<br>(-1.82)        | -0.065***<br>(-5.10) | 0.005<br>(0.42)            |                         |                                 |                                 | -0.032<br>(-1.53)         | -0.062***<br>(-4.89) | 0.006<br>(0.48)            |                         |
| Return                      |                                 |                                 | -0.073<br>(-1.60)         | -0.022***<br>(-3.34) | -0.019<br>(-0.49)          |                         |                                 |                                 | -0.062*<br>(-1.91)        | -0.019***<br>(-3.37) | -0.009<br>(-0.25)          |                         |
| ROA                         |                                 |                                 |                           |                      | 0.017<br>(0.91)            | 0.082**<br>(2.55)       |                                 |                                 |                           |                      | 0.023<br>(1.26)            | 0.085***<br>(2.79)      |
| Dividend Cut                |                                 |                                 |                           |                      | -0.014<br>(-1.51)          |                         |                                 |                                 |                           |                      | -0.017*<br>(-1.82)         |                         |

|                                                          | <i>ln</i> (Stock<br>Volatility) | <i>ln</i> (Asset<br>Volatility) | <i>R&amp;D</i><br>Expense | -CAPEX             | <i>Herfindahl</i><br>Index | <i>Book</i><br>Leverage | <i>ln</i> (Stock<br>Volatility) | <i>ln</i> (Asset<br>Volatility) | <i>R&amp;D</i><br>Expense | -CAPEX             | <i>Herfindahl</i><br>Index | <i>Book</i><br>Leverage |
|----------------------------------------------------------|---------------------------------|---------------------------------|---------------------------|--------------------|----------------------------|-------------------------|---------------------------------|---------------------------------|---------------------------|--------------------|----------------------------|-------------------------|
|                                                          | (1)                             | (2)                             | (3)                       | (4)                | (5)                        | (6)                     | (7)                             | (8)                             | (9)                       | (10)               | (11)                       | (12)                    |
| Turnover                                                 |                                 |                                 |                           |                    | -0.000<br>(-0.03)          |                         |                                 |                                 |                           |                    | -0.004<br>(-0.31)          |                         |
| PPE                                                      |                                 |                                 |                           |                    |                            | 0.092***<br>(3.30)      |                                 |                                 |                           |                    |                            | 0.070**<br>(2.45)       |
| Mod. Z-Score                                             |                                 |                                 |                           |                    |                            | -0.284***<br>(-9.47)    |                                 |                                 |                           |                    |                            | -0.244***<br>(-7.14)    |
| Rating                                                   |                                 |                                 |                           |                    |                            | 0.247***<br>(7.68)      |                                 |                                 |                           |                    |                            | 0.272***<br>(13.07)     |
| Delta                                                    | -0.003<br>(-0.20)               | 0.014<br>(0.75)                 | 0.026<br>(1.60)           | -0.021<br>(-1.32)  | -0.020<br>(-0.84)          | -0.124***<br>(-4.76)    |                                 |                                 |                           |                    |                            |                         |
| Total Wealth                                             |                                 |                                 |                           |                    |                            |                         | 0.044***<br>(2.66)              | 0.113***<br>(5.81)              | 0.068***<br>(4.74)        | 0.002<br>(0.11)    | -0.004<br>(-0.19)          | -0.038*<br>(-1.88)      |
| Delta /<br>Total Wealth                                  |                                 |                                 |                           |                    |                            |                         | -0.342***<br>(-8.78)            | -0.417***<br>(-11.47)           | -0.056**<br>(-2.49)       | -0.014<br>(-0.89)  | -0.064**<br>(-2.45)        | -0.029*<br>(-1.94)      |
| Total<br>Sensitivity<br>Financing<br>Sens.               | 0.001<br>(0.06)                 | 0.122***<br>(5.99)              | 0.108***<br>(3.60)        | 0.045***<br>(3.12) | 0.032<br>(1.24)            |                         |                                 |                                 |                           |                    |                            |                         |
| Tot. Sens. /<br>Tot. Wealth                              |                                 |                                 |                           |                    |                            | 0.271***<br>(11.28)     |                                 |                                 |                           |                    |                            |                         |
| Fin. Sens. /<br>Tot. Wealth                              |                                 |                                 |                           |                    |                            |                         | 0.198***<br>(14.32)             | 0.276***<br>(10.76)             | 0.168***<br>(5.67)        | 0.065***<br>(3.20) | 0.057**<br>(2.13)          | 0.322***<br>(2.85)      |
| Observations                                             | 8,600                           | 7,797                           | 8,192                     | 8,189              | 7,849                      | 8,104                   | 8,600                           | 7,797                           | 8,192                     | 8,189              | 7,849                      | 8,104                   |
| R-squared                                                | 0.546                           | 0.389                           | 0.475                     | 0.456              | 0.218                      | 0.428                   | 0.604                           | 0.471                           | 0.483                     | 0.457              | 0.220                      | 0.457                   |
| Diff. in<br>Coefficients                                 | 0.089***<br>(4.94)              | 0.120***<br>(5.95)              | -0.028**<br>(-2.27)       | 0.007<br>(0.52)    | 0.023<br>(1.15)            | 0.353***<br>(10.12)     | 0.151***<br>(7.07)              | 0.128***<br>(2.97)              | -0.087***<br>(-5.04)      | 0.002<br>(0.10)    | -0.020<br>(-0.92)          | 0.372***<br>(3.45)      |
| Avg. diff. in coeff. excluding Fin. Sens.<br>t-statistic |                                 |                                 |                           | 0.042***<br>(4.64) |                            |                         |                                 |                                 | 0.034**<br>(2.52)         |                    |                            |                         |
| Avg. diff. in coeff. including Fin. Sens.<br>t-statistic |                                 |                                 |                           | 0.094***<br>(9.65) |                            |                         |                                 |                                 | 0.091***<br>(4.08)        |                    |                            |                         |
